# Supplementary material
Source: HighWire-hosted journal article supplement (https://www.annfammed.org/content/suppl/2019/01/22/17.1.61)
Supplement: Andersen_Supp_Apps.pdf [file Andersen_Supp_Apps.pdf]

**Supplemental materials for:**

Andersen CA, Holden S, Vela J, Rathleff M, Jensen M. Point-of-care ultrasound in general practice: a systematic review. *Ann Fam Med*. 2019;17(1):61-69.

---

# Supplemental Appendix 1. Search string

---

## *Point-of-care ultrasound in general practice: A systematic review*

This appendix includes a full description of the literature search conducted in MEDLINE via PubMed, EMBASE via OVID, CINAHL via Ebsco, Web of Science, and Cochrane Central Register of Controlled Trials (CENTRAL) on May 12<sup>th</sup> 2016 and updated on August 21<sup>st</sup> 2017. The search was conducted by the principal investigator (Camilla Aakjær Andersen) and a medical librarian at the medical library at Aalborg University Hospital, Aalborg, Denmark. All databases were searched from inception date until August 21<sup>st</sup> 2017.

| Database       | Interface | Number of hits 12.05.2016 | Number of hits 21.08.2017 |
|----------------|-----------|---------------------------|---------------------------|
| MEDLINE        | Pubmed    | 2337                      | 242                       |
| EMBASE         | OVID      | 4219                      | 567                       |
| CINAHL         | Ebsco     | 393                       | 41                        |
| Web of Science |           | 2787                      | 434                       |
| Cochrane       |           | 253                       | 104                       |

### **MEDLINE 12.05.16 (updated 21.08.2017)**

Interface: Pubmed

Recent queries

| Search              | Add to builder      | Query                                                                                                                                                                                                                                                                                                                                                                                                                                                                                                                                                                                                                                                                                                                                                                                                                                                       | Items found            | Time     |
|---------------------|---------------------|-------------------------------------------------------------------------------------------------------------------------------------------------------------------------------------------------------------------------------------------------------------------------------------------------------------------------------------------------------------------------------------------------------------------------------------------------------------------------------------------------------------------------------------------------------------------------------------------------------------------------------------------------------------------------------------------------------------------------------------------------------------------------------------------------------------------------------------------------------------|------------------------|----------|
| <a href="#">#19</a> | <a href="#">Add</a> | Search (((((((((((("Private Practice"[Mesh]) OR "General Practice"[Mesh]) OR "Primary Health Care"[Mesh]) OR "General Practitioners"[Mesh]) OR "Physicians, Family"[Mesh]) OR "Physicians, Primary Care"[Mesh]) OR ("Primary Care Physician"[tw] OR "Primary Care Physicians"[tw])) OR ("General Practice"[tw] OR "General Practitioner"[tw] OR "General Practitioners"[tw])) OR ("Family Physician"[tw] OR "Family Physicians"[tw])) OR "Primary Health Care"[tw]) OR ("Family Practitioner"[tw] OR "Family Practice"[tw] OR "Family Practitioners"[tw])) OR ("family medicine practice"[tw] OR "family medicine practitioner"[tw] OR "family medicine practitioners"[tw])) OR ("private practice"[tw] OR "private practitioner"[tw] OR "private practitioners"[tw])) AND ("Ultrasonography"[Mesh]) OR (Ultraso*[tw] OR sonograph*[tw] OR echograph*[tw])) | <a href="#">2337</a>   | 04:48:37 |
| <a href="#">#18</a> | <a href="#">Add</a> | Search ("Ultrasonography"[Mesh]) OR (Ultraso*[tw] OR sonograph*[tw] OR echograph*[tw])                                                                                                                                                                                                                                                                                                                                                                                                                                                                                                                                                                                                                                                                                                                                                                      | <a href="#">517866</a> | 04:35:14 |
| <a href="#">#17</a> | <a href="#">Add</a> | Search Ultraso*[tw] OR sonograph*[tw] OR echograph*[tw]                                                                                                                                                                                                                                                                                                                                                                                                                                                                                                                                                                                                                                                                                                                                                                                                     | <a href="#">458529</a> | 04:35:07 |
| <a href="#">#16</a> | <a href="#">Add</a> | Search "Ultrasonography"[Mesh]                                                                                                                                                                                                                                                                                                                                                                                                                                                                                                                                                                                                                                                                                                                                                                                                                              | <a href="#">269767</a> | 04:34:15 |
| <a href="#">#15</a> | <a href="#">Add</a> | Search (((((((((((("Private Practice"[Mesh]) OR "General Practice"[Mesh]) OR "Primary Health Care"[Mesh]) OR "General Practitioners"[Mesh]) OR "Physicians, Family"[Mesh]) OR "Physicians, Primary Care"[Mesh]) OR ("Primary Care Physician"[tw] OR "Primary Care Physicians"[tw])) OR ("General Practice"[tw] OR "General Practitioner"[tw] OR "General Practitioners"[tw])) OR ("Family Physician"[tw] OR "Family Physicians"[tw])) OR "Primary Health Care"[tw]) OR ("Family Practitioner"[tw] OR "Family Practice"[tw] OR "Family Practitioners"[tw])) OR ("family medicine practice"[tw] OR "family medicine practitioner"[tw] OR "family medicine practitioners"[tw])) OR ("private practice"[tw] OR "private practitioner"[tw] OR "private practitioners"[tw]))                                                                                      | <a href="#">259026</a> | 04:33:55 |
| <a href="#">#14</a> | <a href="#">Add</a> | Search "private practice"[tw] OR "private practitioner"[tw] OR "private practitioners"[tw]                                                                                                                                                                                                                                                                                                                                                                                                                                                                                                                                                                                                                                                                                                                                                                  | <a href="#">13837</a>  | 04:32:58 |
| <a href="#">#13</a> | <a href="#">Add</a> | Search "family medicine practice"[tw] OR "family medicine practitioner"[tw] OR "family medicine practitioners"[tw]                                                                                                                                                                                                                                                                                                                                                                                                                                                                                                                                                                                                                                                                                                                                          | <a href="#">168</a>    | 04:32:06 |
| <a href="#">#12</a> | <a href="#">Add</a> | Search "Family Practitioner"[tw] OR "Family Practice"[tw] OR "Family Practitioners"[tw]                                                                                                                                                                                                                                                                                                                                                                                                                                                                                                                                                                                                                                                                                                                                                                     | <a href="#">66195</a>  | 04:31:01 |
| <a href="#">#11</a> | <a href="#">Add</a> | Search "Primary Health Care"[tw]                                                                                                                                                                                                                                                                                                                                                                                                                                                                                                                                                                                                                                                                                                                                                                                                                            | <a href="#">70189</a>  | 04:29:55 |
| <a href="#">#10</a> | <a href="#">Add</a> | Search "Family Physician"[tw] OR "Family Physicians"[tw]                                                                                                                                                                                                                                                                                                                                                                                                                                                                                                                                                                                                                                                                                                                                                                                                    | <a href="#">25064</a>  | 04:29:34 |
| <a href="#">#9</a>  | <a href="#">Add</a> | Search "General Practice"[tw] OR "General Practitioner"[tw] OR "General Practitioners"[tw]                                                                                                                                                                                                                                                                                                                                                                                                                                                                                                                                                                                                                                                                                                                                                                  | <a href="#">71834</a>  | 04:28:50 |
| <a href="#">#8</a>  | <a href="#">Add</a> | Search "Primary Care Physician"[tw] OR "Primary Care Physicians"[tw]                                                                                                                                                                                                                                                                                                                                                                                                                                                                                                                                                                                                                                                                                                                                                                                        | <a href="#">16496</a>  | 04:27:23 |
| <a href="#">#7</a>  | <a href="#">Add</a> | Search "Physicians, Primary Care"[Mesh]                                                                                                                                                                                                                                                                                                                                                                                                                                                                                                                                                                                                                                                                                                                                                                                                                     | <a href="#">1811</a>   | 04:25:03 |
| <a href="#">#6</a>  | <a href="#">Add</a> | Search "Physicians, Family"[Mesh]                                                                                                                                                                                                                                                                                                                                                                                                                                                                                                                                                                                                                                                                                                                                                                                                                           | <a href="#">15326</a>  | 04:24:46 |

| Recent queries |                     |                                               |                        |          |
|----------------|---------------------|-----------------------------------------------|------------------------|----------|
| Search         | Add to builder      | Query                                         | Items found            | Time     |
| #5             | <a href="#">Add</a> | Search " <b>General Practitioners</b> "[Mesh] | <a href="#">4640</a>   | 04:24:33 |
| #4             | <a href="#">Add</a> | Search " <b>Primary Health Care</b> "[Mesh]   | <a href="#">113371</a> | 04:24:14 |
| #3             | <a href="#">Add</a> | Search " <b>General Practice</b> "[Mesh]      | <a href="#">68490</a>  | 04:23:59 |
| #2             | <a href="#">Add</a> | Search " <b>Private Practice</b> "[Mesh]      | <a href="#">11252</a>  | 04:23:35 |

## EMBASE 12.05.2016 (updated 21.08.2017)

Interface: OvidSP

Database: Embase 1974 to 2017

|    |                                                       |        |
|----|-------------------------------------------------------|--------|
| 1  | exp private practice/                                 | 13762  |
| 2  | exp general practice/                                 | 74696  |
| 3  | primary health care/                                  | 52053  |
| 4  | general practitioner/                                 | 73375  |
| 5  | general practi*.mp.                                   | 168448 |
| 6  | Primary care physician*.mp.                           | 20575  |
| 7  | family physician*.mp.                                 | 15375  |
| 8  | primary health care.mp.                               | 61217  |
| 9  | family practi*.mp.                                    | 11276  |
| 10 | family medicine practi*.mp.                           | 368    |
| 11 | private practi*.mp.                                   | 20521  |
| 12 | 1 or 2 or 3 or 4 or 5 or 6 or 7 or 8 or 9 or 10 or 11 | 255926 |
| 13 | exp echography/                                       | 607521 |
| 14 | exp ultrasound/                                       | 129643 |
| 15 | ultraso*.mp.                                          | 456732 |
| 16 | sonograph*.mp.                                        | 63847  |
| 17 | echograph*.mp.                                        | 341379 |
| 18 | 13 or 14 or 15 or 16 or 17                            | 836843 |
| 19 | 12 and 18                                             | 4219   |

**CINAHL 12.05.2016 (updated 21.08.2017)**

Interface: Ebsco

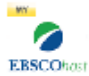

Thursday, May 12, 2016 5:31:18 AM

| #   | Query                                                            | Limiters/Expanders           | Last Run Via                                                                                                    | Results |
|-----|------------------------------------------------------------------|------------------------------|-----------------------------------------------------------------------------------------------------------------|---------|
| 81  | (MH "Private Practice")                                          | Search modes - BooleanPhrase | Interface - EBSCOhost Research Databases<br>Search Screen - Advanced Search<br>Database - CINAHL with Full Text | 3,959   |
| 82  | (MH "Family Practice")                                           | Search modes - BooleanPhrase | Interface - EBSCOhost Research Databases<br>Search Screen - Advanced Search<br>Database - CINAHL with Full Text | 11,738  |
| 83  | (MH "Primary Health Care")                                       | Search modes - BooleanPhrase | Interface - EBSCOhost Research Databases<br>Search Screen - Advanced Search<br>Database - CINAHL with Full Text | 32,878  |
| 84  | (MH "Physicians, Family")                                        | Search modes - BooleanPhrase | Interface - EBSCOhost Research Databases<br>Search Screen - Advanced Search<br>Database - CINAHL with Full Text | 8,972   |
| 85  | primary care physician*                                          | Search modes - BooleanPhrase | Interface - EBSCOhost Research Databases<br>Search Screen - Advanced Search<br>Database - CINAHL with Full Text | 4,191   |
| 86  | general pract*                                                   | Search modes - BooleanPhrase | Interface - EBSCOhost Research Databases<br>Search Screen - Advanced Search<br>Database - CINAHL with Full Text | 11,908  |
| 87  | family physician*                                                | Search modes - BooleanPhrase | Interface - EBSCOhost Research Databases<br>Search Screen - Advanced Search<br>Database - CINAHL with Full Text | 2,808   |
| 88  | primary health care                                              | Search modes - BooleanPhrase | Interface - EBSCOhost Research Databases<br>Search Screen - Advanced Search<br>Database - CINAHL with Full Text | 35,036  |
| 89  | family pract*                                                    | Search modes - BooleanPhrase | Interface - EBSCOhost Research Databases<br>Search Screen - Advanced Search<br>Database - CINAHL with Full Text | 12,998  |
| 810 | family medicine pract*                                           | Search modes - BooleanPhrase | Interface - EBSCOhost Research Databases<br>Search Screen - Advanced Search<br>Database - CINAHL with Full Text | 83      |
| 811 | private pract*                                                   | Search modes - BooleanPhrase | Interface - EBSCOhost Research Databases<br>Search Screen - Advanced Search<br>Database - CINAHL with Full Text | 8,755   |
| 812 | S1 OR S2 OR S3 OR S4 OR S5 OR S6 OR S7 OR S8 OR S9 OR S10 OR S11 | Search modes - BooleanPhrase | Interface - EBSCOhost Research Databases<br>Search Screen - Advanced Search<br>Database - CINAHL with Full Text | 68,383  |
| 813 | (MH "Ultrasonography")                                           | Search modes - BooleanPhrase | Interface - EBSCOhost Research Databases<br>Search Screen - Advanced Search<br>Database - CINAHL with Full Text | 34,226  |
| 814 | ultraso*                                                         | Search modes - BooleanPhrase | Interface - EBSCOhost Research Databases<br>Search Screen - Advanced Search<br>Database - CINAHL with Full Text | 44,235  |
| 815 | sonograph*                                                       | Search modes - BooleanPhrase | Interface - EBSCOhost Research Databases<br>Search Screen - Advanced Search<br>Database - CINAHL with Full Text | 3,436   |
| 816 | echograph*                                                       | Search modes - BooleanPhrase | Interface - EBSCOhost Research Databases<br>Search Screen - Advanced Search<br>Database - CINAHL with Full Text | 141     |
| 817 | S13 OR S14 OR S15 OR S16                                         | Search modes - BooleanPhrase | Interface - EBSCOhost Research Databases<br>Search Screen - Advanced Search<br>Database - CINAHL with Full Text | 54,765  |
| 818 | S12 AND S17                                                      | Search modes - BooleanPhrase | Interface - EBSCOhost Research Databases<br>Search Screen - Advanced Search<br>Database - CINAHL with Full Text | 394     |

**Web of Science 12.05.2016 (updated 21.08.2017)**

Search History: **Web of Science™ Core Collection**

| Set  | Results | Save History / Create Alert                                                                                                       | Open Saved History | Edit Sets                | Combine Sets                                       |         | Delete Sets |        |
|------|---------|-----------------------------------------------------------------------------------------------------------------------------------|--------------------|--------------------------|----------------------------------------------------|---------|-------------|--------|
|      |         |                                                                                                                                   |                    |                          | <input type="radio"/> AND <input type="radio"/> OR | Combine | Select All  | Delete |
| # 13 | 2,787   | #12 AND #8<br><i>Indexes=SCI-EXPANDED, SSCI, A&amp;HCI, CPCI-S, CPCI-SSH, ESCI Timespan=All years</i>                             | Edit               | <input type="checkbox"/> | <input type="checkbox"/>                           |         |             |        |
| # 12 | 431,663 | #11 OR #10 OR #9<br><i>Indexes=SCI-EXPANDED, SSCI, A&amp;HCI, CPCI-S, CPCI-SSH, ESCI Timespan=All years</i>                       | Edit               | <input type="checkbox"/> | <input type="checkbox"/>                           |         |             |        |
| # 11 | 5,317   | TOPIC: (echograph*)<br><i>Indexes=SCI-EXPANDED, SSCI, A&amp;HCI, CPCI-S, CPCI-SSH, ESCI Timespan=All years</i>                    | Edit               | <input type="checkbox"/> | <input type="checkbox"/>                           |         |             |        |
| # 10 | 55,241  | TOPIC: (sonograph*)<br><i>Indexes=SCI-EXPANDED, SSCI, A&amp;HCI, CPCI-S, CPCI-SSH, ESCI Timespan=All years</i>                    | Edit               | <input type="checkbox"/> | <input type="checkbox"/>                           |         |             |        |
| # 9  | 404,016 | TOPIC: (ultraso*)<br><i>Indexes=SCI-EXPANDED, SSCI, A&amp;HCI, CPCI-S, CPCI-SSH, ESCI Timespan=All years</i>                      | Edit               | <input type="checkbox"/> | <input type="checkbox"/>                           |         |             |        |
| # 8  | 329,817 | #7 OR #6 OR #5 OR #4 OR #3 OR #2 OR #1<br><i>Indexes=SCI-EXPANDED, SSCI, A&amp;HCI, CPCI-S, CPCI-SSH, ESCI Timespan=All years</i> | Edit               | <input type="checkbox"/> | <input type="checkbox"/>                           |         |             |        |
| # 7  | 34,508  | TOPIC: (primary care physician*)<br><i>Indexes=SCI-EXPANDED, SSCI, A&amp;HCI, CPCI-S, CPCI-SSH, ESCI Timespan=All years</i>       | Edit               | <input type="checkbox"/> | <input type="checkbox"/>                           |         |             |        |
| # 6  | 159,796 | TOPIC: (general practi*)<br><i>Indexes=SCI-EXPANDED, SSCI, A&amp;HCI, CPCI-S, CPCI-SSH, ESCI Timespan=All years</i>               | Edit               | <input type="checkbox"/> | <input type="checkbox"/>                           |         |             |        |
| # 5  | 26,473  | TOPIC: (family physician*)<br><i>Indexes=SCI-EXPANDED, SSCI, A&amp;HCI, CPCI-S, CPCI-SSH, ESCI Timespan=All years</i>             | Edit               | <input type="checkbox"/> | <input type="checkbox"/>                           |         |             |        |
| # 4  | 83,194  | TOPIC: (primary health care)<br><i>Indexes=SCI-EXPANDED, SSCI, A&amp;HCI, CPCI-S, CPCI-SSH, ESCI Timespan=All years</i>           | Edit               | <input type="checkbox"/> | <input type="checkbox"/>                           |         |             |        |
| # 3  | 7,320   | TOPIC: (family medicine practi*)<br><i>Indexes=SCI-EXPANDED, SSCI, A&amp;HCI, CPCI-S, CPCI-SSH, ESCI Timespan=All years</i>       | Edit               | <input type="checkbox"/> | <input type="checkbox"/>                           |         |             |        |
| # 2  | 69,651  | TOPIC: (family practi*)<br><i>Indexes=SCI-EXPANDED, SSCI, A&amp;HCI, CPCI-S, CPCI-SSH, ESCI Timespan=All years</i>                | Edit               | <input type="checkbox"/> | <input type="checkbox"/>                           |         |             |        |
| # 1  | 27,235  | TOPIC: (private practi*)<br><i>Indexes=SCI-EXPANDED, SSCI, A&amp;HCI, CPCI-S, CPCI-SSH, ESCI Timespan=All years</i>               | Edit               | <input type="checkbox"/> | <input type="checkbox"/>                           |         |             |        |

AND  OR



## Cochrane Central Register of Controlled Trials 12.05.2016 (updated 21.08.2017)

Date Run: 12/05/16 09:23:03.788

Description:

| ID  | Search Hits                                                                   |
|-----|-------------------------------------------------------------------------------|
| #1  | MeSH descriptor: [Private Practice] explode all trees 137                     |
| #2  | MeSH descriptor: [Primary Health Care] explode all trees 5823                 |
| #3  | MeSH descriptor: [General Practitioners] explode all trees 144                |
| #4  | MeSH descriptor: [Physicians, Family] explode all trees 475                   |
| #5  | MeSH descriptor: [Physicians, Primary Care] explode all trees 102             |
| #6  | primary care physician*:ti,ab,kw (Word variations have been searched) 4165    |
| #7  | general practi*:ti,ab,kw (Word variations have been searched) 10901           |
| #8  | family physician*:ti,ab,kw (Word variations have been searched) 2390          |
| #9  | "primary health care":ti,ab,kw (Word variations have been searched) 4526      |
| #10 | family practi*:ti,ab,kw (Word variations have been searched) 5516             |
| #11 | family medicine practi*:ti,ab,kw (Word variations have been searched) 675     |
| #12 | private practi*:ti,ab,kw (Word variations have been searched) 1150            |
| #13 | #1 or #2 or #3 or #4 or #5 or #6 or #7 or #8 or #9 or #10 or #11 or #12 22969 |
| #14 | MeSH descriptor: [Ultrasonography] explode all trees 8872                     |
| #15 | ultraso*:ti,ab,kw (Word variations have been searched) 18428                  |
| #16 | echograph*:ti,ab,kw (Word variations have been searched) 3190                 |
| #17 | sonograph*:ti,ab,kw (Word variations have been searched) 1764                 |
| #18 | #14 or #15 or #16 or #17 23749                                                |
| #19 | #13 and #18 253                                                               |

# Supplemental Appendix 2. Data extraction template

---

## *Point-of-care ultrasound in general practice: A systematic review*

This appendix lists the data extraction template used in this review. The template is an adapted version of the Cochrane data extraction form (<http://training.cochrane.org/resource/data-collection-forms-intervention-reviews>) and the Downs and Blacks checklist<sup>1</sup> respectively.

PROSPERO registration ID: CRD42016038302

Data extraction according to Cochrane data collection form + Down and Blacks quality assessment tool

### General information

Date extraction completed

Name of person extracting data

Report title

Year of publication

Report ID (Author name and number)

Published in

Publication type

Study funding source

Possible conflict of interest

### Eligibility

Review inclusion criteria meet

Reporting use of US?

Reporting training in the use og US?

Type of study

### **Participants: (GPs)**

Who was performing the scan?

category

### **Intervention**

Type of scanner described?

firm

portable?

Doppler?

Probe

Scanning procedure described?

### **Population and setting**

Number of clinics

Number of GPs/GPs in training performing us?

Withdrawals and exclusion (GPs)?

### **Population description (GPs)**

Age?

Sex?

Experience?

Other relevant information?

Inclusion criteria (GPs)

Exclusion criteria (GPs)

Method/s of recruitment of participants (GPs)

## Setting

Country

Location: City/rural

Location: Hospital/private clinic

## Methods

data source

design

Aim of study

start date

end date

duration

## Participants

Total no. Participants (patients)

Total invited patients

Total no. Participants (Scans)

Scans pr GP

Withdrawals and exclusion

Age

Sex

Other relevant sociodemographics

Inclusion criteria (patients)

Exclusion criteria (patients)

Method/s of recruitment of participants (patients)

## Outcomes

## **The use of US**

1. Is the extend of the examination decribed?

1.a Focused/Full examination

1.b Procedure described (probe placement)

1.c. Exact measurements described

2. Which organs are scanned?

3. On which indication do the GPs scan?

3.a Diagnostic purpose?

3.b Procedure related purpose?

3.c Screening purpose?

4. Frequency

4.a How often did the GP use POC-US? (everyday ?)

4.b In how many of the consultations were US used?

5. How much extra time was used on POC-US performed by GPs?

## **Training**

6. Which type for training did the GP recieve?

6.a How many hours of training the GPs received prior to using POC-US?

6.b Which elements did the traning consist of?

6.c Was the training assesed?

6.d Who assesed the training?

6.e Was there a examination/certification at the end of training?

## **Quality assesment**

7. How was the quality of the scans performed by a GP assessed?

8. Who assessed the quality of the GPs scans?

9. Was a gold standard used?

10. Description of the patient perspective on scans performed by GPs?

11. Description of the financial costs associated with POC-US performed by GPs?

12. What possible harms, following the use of POC-US in general practice, are described in the papers?

12.a Overlooked conditions?

12.b Incidental findings?

12.c Misdiagnosis?

12.d overdiagnosis and overtreatment?

12.e Estimate on diagnostic accuracy

12.f Technical difficulties

### **Applicability**

Have important populations been excluded from the study?

Does the study directly address the review question?

Note

### **Other information**

Key conclusions by author

Note

### **Risk of bias/quality assessment (Downs and Black)**

#### **Reporting**

1. Is the hypothesis/aim/objective of the study clearly described?

2. Are the main outcomes to be measured clearly described in the Introduction or Methods section?

3. Are the characteristics of the patients included in the study clearly described ?

4. Are the interventions of interest clearly described?

5. Are the distributions of principal confounders in each group of subjects to be compared clearly described?
6. Are the main findings of the study clearly described?
7. Does the study provide estimates of the random variability in the data for the main outcomes?
8. Have all important adverse events that may be a consequence of the intervention been reported?
9. Have the characteristics of patients lost to follow-up been described?
10. Have actual probability values been reported (e.g. 0.035 rather than  $<0.05$ ) for the main outcomes except where the probability value is less than 0.001?

#### **External validity**

11. Were the subjects asked to participate in the study representative of the entire population from which they were recruited?
12. Were those subjects who were prepared to participate representative of the entire population from which they were recruited?
13. Were the staff, places, and facilities where the patients were treated, representative of the treatment the majority of patients receive?

#### **Internal validity - bias**

14. Was an attempt made to blind study subjects to the intervention they have received ?
15. Was an attempt made to blind those measuring the main outcomes of the intervention?
16. If any of the results of the study were based on "data dredging", was this made clear?
17. In trials and cohort studies, do the analyses adjust for different lengths of follow-up of patients, or in case-control studies, is the time period between the intervention and outcome the same for cases and controls ?
18. Were the statistical tests used to assess the main outcomes appropriate?
20. Were the main outcome measures used accurate (valid and reliable)?

**Internal validity - confounding (selection bias)**

25. Was there adequate adjustment for confounding in the analyses from which the main findings were drawn?

26. Were losses of patients to follow-up taken into account?

**Total score**



# Supplemental Appendix 3. Study characteristics

## *Point-of-care ultrasound in general practice: A systematic review*

This appendix lists the characteristics of the included articles.

**Web table 3.1 Characteristics of the included articles**

| Study                    |         | Study characteristics |                      |                       | Participants characteristics |          |                         |                |                   |                                 |                    |
|--------------------------|---------|-----------------------|----------------------|-----------------------|------------------------------|----------|-------------------------|----------------|-------------------|---------------------------------|--------------------|
| Author                   | ref.no. | Year                  | Design               | Downs and Black score | Country                      | Location | Type of clinic          | Participant    | Number of clinics | Number of participants (GP/GPT) | Number of patients |
| Bailey                   | 15      | 2001                  | Prospective cohort   | 10                    | USA                          | ND       | Hospital                | GPT            | 1                 | 16                              | 74                 |
| Barabas                  | 16      | 2005                  | Cross-sectional      | 16                    | Sweden                       | ND       | Municipal nursing homes | GP             | 3                 | 1                               | 147                |
| Blois                    | 17      | 2012                  | Cross-sectional      | 13                    | Canada                       | Rural    | Primary care clinic     | GPT            | 1                 | 1                               | 47                 |
| Bornemann                | 18      | 2014                  | Prospective cohort   | 5                     | USA                          | ND       | Tripler army center     | GPT, faculty   | 1                 | 15 (7)                          | ND                 |
| Bornemann                | 19      | 2015                  | Prospective cohort   | 18                    | USA                          | ND       | Tripler army center     | GP, GPT        | 1                 | 4                               | 101                |
| Bornemann                | 20      | 2017                  | Prospective cohort   | 13                    | USA                          | ND       | Hospital                | GPT            | ND                | 17                              | ND                 |
| Bratland (obstetric)     | 21      | 1985                  | Prospective cohort   | 16                    | Norway                       | Rural    | Primary care clinic     | GP             | 1                 | 1                               | 44                 |
| Bratland (evaluation)    | 22      | 1985                  | Prospective cohort   | 6                     | Norway                       | Rural    | Primary care clinic     | GP             | 1                 | 1                               | 378                |
| Bratland (gallbladder)   | 23      | 1985                  | Prospective cohort   | 13                    | Norway                       | Rural    | Primary care clinic     | GP             | 1                 | 1                               | 55                 |
| Bratland (urinary tract) | 24      | 1985                  | Prospective cohort   | 13                    | Norway                       | Rural    | Primary care clinic     | GP             | 1                 | 1                               | 56                 |
| Bratland (heart)         | 25      | 1985                  | Prospective cohort   | 11                    | Norway                       | Rural    | Primary care clinic     | GP             | 1                 | 1                               | 51                 |
| Busse                    | 26      | 1999                  | Cross-sectional      | 14                    | Germany                      | ND       | Primary care clinic     | GP, internists | ND                | 86 (57)                         | 1.217              |
| Chan                     | 27      | 1999                  | Retrospective cohort | 10                    | Australia                    | Suburban | Primary care clinic     | GP             | 1                 | 1                               | 273                |
| Chavez                   | 28      | 2015                  | Cross-sectional      | 18                    | Nepal, Peru                  | Rural    | Hospital                | GP             | ND                | 2                               | 378                |
| Chebli                   | 29      | 2017                  | Cross-sectional      | 12                    | Morocco                      | Rural    | School                  | GP             | ND                | 24                              | 5367               |

|                    |           |      |                      |    |           |                     |                                          |                                     |                                                                  |          |                   |
|--------------------|-----------|------|----------------------|----|-----------|---------------------|------------------------------------------|-------------------------------------|------------------------------------------------------------------|----------|-------------------|
| <b>Colli</b>       | <b>30</b> | 2015 | Prospective cohort   | 11 | Italy     | Both city and rural | Hospitals, GP office                     | GP, hospital doctors                | Four medical wards, 1 outpatient clinic and 90 general practices | 135 (90) | 2014              |
| <b>Del Carpio</b>  | <b>31</b> | 2012 | Prospective cohort   | 10 | Argentina | Rural               | Schools                                  | GP, GPT                             | ND                                                               | 180      | ND (22.793 scans) |
| <b>Deutchman</b>   | <b>32</b> | 1994 | Cross-sectional      | 15 | USA       | Both city and rural | Primary care clinic                      | GP                                  | 3                                                                | ND       | 221               |
| <b>Dingwall</b>    | <b>33</b> | 1979 | Cross-sectional      | 8  | Scotland  | Both city and rural | Primary care clinic                      | GP                                  | 3                                                                | 3        | ND (45 scans)     |
| <b>Eggebø</b>      | <b>34</b> | 1989 | Prospective cohort   | 11 | Norway    | Rural               | Primary care clinic                      | GP                                  | 1                                                                | 1        | 102               |
| <b>Eggebø</b>      | <b>35</b> | 1990 | Prospective cohort   | 10 | Norway    | Rural               | Primary care clinic                      | GP                                  | 1                                                                | 1        | 189               |
| <b>Ellington</b>   | <b>36</b> | 2017 | Cross-sectional      | 20 | Peru      | City                | Hospital                                 | GP                                  | 1                                                                | 3        | 1062              |
| <b>Evangelista</b> | <b>37</b> | 2016 | Prospective cohort   | 17 | Spain     | Rural               | Primary care clinic                      | GP                                  | 3                                                                | 14       | 1312              |
| <b>Everett</b>     | <b>38</b> | 1996 | Prospective cohort   | 10 | UK        | City                | Health center ultrasound clinic          | Senior Midwife and GP               | 1                                                                | 1        | 240               |
| <b>Filipas</b>     | <b>39</b> | 2003 | Prospective cohort   | 8  | Germany   | City                | Primary care clinic                      | GPs, general internists, urologists | ND                                                               | 153 (55) | 9959              |
| <b>Gillespie</b>   | <b>40</b> | 1998 | Cross-sectional      | 7  | England   | City                | Primary care clinic                      | Technician and GPs                  | 1                                                                | 3 (2)    | ND                |
| <b>Glasoe</b>      | <b>41</b> | 2007 | Prospective cohort   | 10 | Norway    | ND                  | Primary care clinic                      | GP                                  | 1                                                                | 3        | 174               |
| <b>Greenlund</b>   | <b>42</b> | 2017 | Cross-sectional      | 8  | USA       | ND                  | Outpatient primary care procedure clinic | GP                                  | 1                                                                | 7        | 31                |
| <b>Hahn</b>        | <b>43</b> | 1988 | Prospective cohort   | 8  | USA       | City                | Primary care clinic                      | GP                                  | 1                                                                | 3        | ND                |
| <b>Hahn</b>        | <b>44</b> | 1988 | Prospective cohort   | 12 | USA       | ND                  | Primary care clinic                      | GP                                  | 4                                                                | 13       | ND                |
| <b>Hussain</b>     | <b>46</b> | 1999 | Prospective cohort   | 7  | UK        | ND                  | Primary care clinic                      | GP                                  | 2                                                                | ND       | 64                |
| <b>Hussain</b>     | <b>45</b> | 2004 | Cross-sectional      | 11 | UK        | ND                  | Primary care clinic                      | GP                                  | 1                                                                | 1        | 50                |
| <b>Johansen</b>    | <b>47</b> | 2002 | Retrospective cohort | 12 | Norway    | Rural               | Primary care clinic                      | GP                                  | 1                                                                | 1        | ND                |
| <b>Keith</b>       | <b>48</b> | 2001 | Retrospective cohort | 13 | USA       | ND                  | Primary care clinic                      | GPT                                 | 1                                                                | ND       | 91                |
| <b>Lindgaard</b>   | <b>49</b> | 2017 | Cross-sectional      | 13 | Denmark   | ND                  | Primary care clinic                      | GP                                  | 5                                                                | 5        | 104               |
| <b>Mjølstad</b>    | <b>50</b> | 2012 | Prospective cohort   | 17 | Norway    |                     | Primary care clinic                      | GP                                  | 3                                                                | 7        | 92                |
| <b>Morgan</b>      | <b>51</b> | 1988 | Case-series          | 5  | USA       |                     | Hospital - based family clinic           | GP                                  | 1                                                                | ND       | 3                 |
| <b>Okahara</b>     | <b>52</b> | 2016 | Retrospective cohort | 10 | Japan     | ND                  | Primary care clinic                      | GP                                  | >=11                                                             | ND       | 135               |

|                      |           |      |                      |    |          |       |                            |                                                            |    |        |                         |
|----------------------|-----------|------|----------------------|----|----------|-------|----------------------------|------------------------------------------------------------|----|--------|-------------------------|
| <b>Ornstein</b>      | <b>53</b> | 1990 | Prospective cohort   | 15 | USA      |       | university                 | GP                                                         | 2  | 4      | 498                     |
| <b>Rodney</b>        | <b>54</b> | 1990 | Prospective cohort   | 16 | USA      |       | Community                  | GP                                                         | 1  | 2      | 207                     |
| <b>Rosenthal</b>     | <b>55</b> | 1993 | Prospective cohort   | 9  | USA      |       | Primary care clinic        | GP                                                         | 1  | 1      | 189                     |
| <b>Siepel</b>        | <b>56</b> | 2000 | Prospective cohort   | 9  | USA      |       | Primary care clinic        | GP                                                         | 1  | 1      | 72                      |
| <b>Siso-almirall</b> | <b>57</b> | 2017 | Prospective cohort   | 15 | Spain    | City  | Primary care clinic        | GP                                                         | 3  | 4      | 1024                    |
| <b>Smith</b>         | <b>58</b> | 1991 | Prospective cohort   | 15 | USA      |       | Primary care clinic        | GPT                                                        | 1  | 12     | ND                      |
| <b>Strasser</b>      | <b>59</b> | 1987 | Retrospective cohort | 16 | canada   |       | Primary care clinic        | GPT                                                        | 2  | ND     | 43                      |
| <b>Szwamel</b>       | <b>60</b> | 2017 | Retrospective cohort | 6  | Poland   | Mixed | Primary care clinic        | GP, GPT, specialties in other branches of medical practice | ND | 81     | ND                      |
| <b>Todsen</b>        | <b>61</b> | 2016 | RCT                  | 17 | Denmark  |       | university teaching center | GP, GPT, ENT doctor                                        | 1  | 31(26) | 4                       |
| <b>Weerasinghe</b>   | <b>62</b> | 2006 | Prospective cohort   | 11 | UAE      |       | Primary care clinic        | GP                                                         | 1  | 3      | 300                     |
| <b>Wong</b>          | <b>63</b> | 2013 | Prospective cohort   | 10 | USA      | ND    | university teaching clinic | GP                                                         | 1  | 8      | 4                       |
| <b>Wordsworth</b>    | <b>64</b> | 2002 | Prospective cohort   | 15 | Scotland | Rural | Primary care clinic        | GP                                                         | 1  | 2      | 131 (500 questionnaire) |
| <b>Zamorano</b>      | <b>65</b> | 2002 | Cross-sectional      | 10 | Spain    | ND    | hospital                   | GP                                                         | 1  | 1      | 200                     |

# Supplemental Appendix 4. Clinical application

---

## *Point-of-care ultrasound in general practice: A systematic review*

This web appendix provides a detailed description of the clinical application of ultrasound and the type of examination performed in the included articles. References to the included articles are provided both in the text and in web table 4.1.

### **Abdominal ultrasound examinations**

An explorative examination of abdominal symptoms was reported in five articles<sup>28,29,47,62,66</sup>. In 11 studies ultrasound was used to screen for abdominal pathology specifically for kidney tumours<sup>41</sup>, gallstones in pregnant women<sup>34</sup>, aortic aneurisms<sup>17,19,57,59,62</sup>, cystic echinococcosis<sup>31,33</sup> and two articles<sup>56,57</sup> described an extensive abdominal screening of asymptomatic patients for pathology relating to the aorta, gallstones, urinary retention, calcified gallbladder, ascites, liver, and kidneys. The remaining articles described a focused approach when examining the following organs: Liver<sup>37,57,65</sup>, gallbladder<sup>20,25,32,34,37,51,57,63,65</sup>, kidney<sup>32,37,57,63,65</sup>, urinary tract<sup>18,26,43,57</sup>, aorta<sup>20,22,32,37,51,56,63,65</sup>, spleen<sup>32</sup>, pancreas<sup>37</sup> and five studies examined for ascites<sup>20,32,51,57,63</sup>. One study<sup>43</sup> declared a focused approach but did not describe which organs were examined.

Time consumption was described for focused examinations to be from <2 minutes to <10 minutes<sup>34,51,63</sup> and 12 minutes for full descriptive examinations of the urinary tract<sup>26</sup>. Examinations of the aorta was performed in 3 to 6 minutes<sup>19,51,59,63</sup>.

### **Obstetric and pelvic ultrasound examinations**

Obstetric application was described in 21 articles. Six articles<sup>23,36,49,55,56,60</sup> described a full detailed obstetric examination and eight articles a focused obstetric examination<sup>20,34,40,43,45,46,51,64</sup> including estimation of gestational age<sup>20, 36,45-47, 49-51, 55,56,60,62</sup>, locating the foetus<sup>20,45-47,49,51,55,56</sup>, detection of foetal heart movement<sup>20,36,40,45-47,49,51,55,56,60</sup>, diagnosing foetal malformations<sup>23,46,49,55,56,60</sup>, and location of the placenta<sup>20,36,46,49,55,60</sup>.

Pelvic examinations were also described in non-pregnant women for diagnostic purposes six articles<sup>24,29,43,47,62,66</sup> and screening for uterine enlargement in two articles<sup>57,58</sup>. Focused examinations were described in four articles<sup>24,43,57,58</sup>, while a full detailed examination was only described in one article<sup>62</sup>. The remaining articles did not provide details on the performed examinations.

Time consumption was described with a mean below 6 minutes [range 2-15 minutes] for focused examination<sup>51</sup> and an average under 11 minutes for full examinations<sup>23</sup>.

## **Ultrasound examinations of the heart.**

The approach for assessing heart function differed widely. Only three articles described a full echocardiography<sup>27,42,67</sup>, whereas eight other articles<sup>20-22,32,39,52,58,65</sup> described various degrees of focused examinations including obtaining an apical 4-chamber-view and measured the septal mitral annular excursion<sup>52</sup>, estimation of left ventricle function at the parasternal long-axis view of the heart<sup>21,22</sup>, obtaining parasternal long- and short axis view together with a four-chamber view and subcostal visualisation of inferior vena cava<sup>39</sup> or simply describing presence or absence of pericardial effusion<sup>32</sup>. The remaining articles<sup>20,58,65</sup> did not specify how the focused ultrasound examination of the heart was performed. In two of the articles, ultrasound examinations of the heart were performed as screening tests for heart disease<sup>39,58</sup>.

Time consumptions was described to be <5 minutes for focused examinations<sup>52</sup> and 18 minutes for more extensive examination<sup>27</sup>.

## Ultrasound examinations of the lungs.

Two articles described US used for diagnosing pneumonia in children<sup>30,38</sup>, where children aged two months to three years were examined in the supine position in six locations according to an international established guideline. Two other papers reported the search for or finding of pleural effusion in adults<sup>22,32</sup>.

Time consumptions was described with a mean of 6.4 minutes<sup>30</sup> and <10 minutes<sup>38</sup>.

## Other areas of use

Two articles reported screening for carotid atherosclerosis<sup>54,58</sup>, whereas eight articles described use of ultrasound in various other areas without providing details of the examination, but including the musculoskeletal system<sup>20,24,29,43,62</sup>, neck<sup>29</sup>, breasts<sup>29</sup>, male pelvis including prostate and scrotum<sup>29,43,62</sup>, venous thrombosis<sup>22</sup>, assessing peripheral circulation<sup>35</sup>, the thyroid gland<sup>43,58,62</sup>, lymph nodes<sup>43</sup>, and skin tumors<sup>43</sup>.

Procedure related ultrasound was used when draining skin abscesses<sup>44</sup>, for breast cyst aspiration (cytology)<sup>29</sup>, and vascular assess<sup>43</sup>.

Time used for the examinations were described to be 5-10 minutes for focused examinations<sup>43</sup> and 15 minutes for detailed screening examinations of the thyroid gland or carotides<sup>58</sup>.

## Web table 4.1 Clinical applications of ultrasound

| Anatomical area | Diagnostic purpose | Screening purpose | Procedure related | Focused examination | Full detailed examination | No details |
|-----------------|--------------------|-------------------|-------------------|---------------------|---------------------------|------------|
|-----------------|--------------------|-------------------|-------------------|---------------------|---------------------------|------------|

|                                  |                                                                            |                |    |                                      |                   |                          |
|----------------------------------|----------------------------------------------------------------------------|----------------|----|--------------------------------------|-------------------|--------------------------|
| <b>Musculoskeletal</b>           | 20,24,29,43,62                                                             |                |    | 20,43                                | 62                | 24,29                    |
| <b>Heart</b>                     | 20,21,22,27,32,3<br>9,42,52,65,67                                          | 39,58          |    | 20,21,22,32,39,52,<br>58,65          | 27,42,67          |                          |
| <b>Lung</b>                      | 22,30,32,38                                                                |                |    | 22,30,32,38                          |                   |                          |
| <b>Abdomen<br/>(unspecified)</b> | 28,29,43,62,66                                                             | 29,58          |    | 43,58                                | 62                | 28,29,66                 |
| <b>FAST</b>                      | 20,32,51,57,63                                                             | 57             |    | 20,32,51,57,63                       |                   |                          |
| <b>Aorta</b>                     | 20,22,32,37,51,5<br>7,62,63,65                                             | 17,19,57,59,62 |    | 17,19,20,22,32,37,<br>51,57,59,63,65 | 62                |                          |
| <b>Liver</b>                     | 37,47,57,62,65                                                             | 29,57          |    | 37,57,65                             | 62                | 29,47                    |
| <b>Gall bladder</b>              | 20,25,29,32,37,4<br>7,51,57,62,63,65                                       | 34,57          |    | 20,25,32,34,37,51,<br>57,63,65       | 62                | 29,47                    |
| <b>Pancreas</b>                  | 37,47,62                                                                   |                |    | 37                                   | 62                | 47                       |
| <b>Spleen</b>                    | 32,47,62                                                                   |                |    | 32                                   | 62                | 47                       |
| <b>Urinary tract</b>             | 18,26,29,43,48,5<br>7,62                                                   | 57             |    | 18,26,43,48,57                       | 62                | 29                       |
| <b>Kidney</b>                    | 29,32,37,47,57,6<br>2,63,65                                                | 41,57          |    | 32,37,57,63,65                       | 41,62             | 29,47                    |
| <b>Cystic Echinococcosis</b>     | 33                                                                         | 31,33          |    | 31,33                                |                   |                          |
| <b>Male pelvis</b>               | 29,43,62                                                                   |                |    | 43                                   | 62                | 29                       |
| <b>Female pelvis</b>             | 24,29,43,47,62,6<br>6                                                      | 57,58          |    | 24,43,57,58                          | 62                | 29,47,66                 |
| <b>Obstetrics</b>                | 20,23,29,34,35,3<br>6,40,43,45,46,47,<br>49,50,51,53,55,5<br>6,60,61,64,66 | 23,35,36,49,60 |    | 20,34,40,43,45,46,<br>51,64          | 23,36,49,55,56,60 | 29,35,47,50,53<br>,61,66 |
| <b>Neck</b>                      | 29                                                                         |                |    |                                      |                   | 29                       |
| <b>Breast</b>                    | 29                                                                         |                | 29 |                                      |                   | 29                       |
| <b>Thyroid</b>                   | 43,62                                                                      | 58             |    | 43,58                                | 62                |                          |
| <b>Soft tissue</b>               | 24                                                                         |                |    | 24                                   |                   |                          |

|                               |       |       |    |       |  |  |
|-------------------------------|-------|-------|----|-------|--|--|
| <b>Skin tumors</b>            | 43,44 |       | 44 | 43,44 |  |  |
| <b>Lymph nodes</b>            | 43    |       |    | 43    |  |  |
| <b>Carotid</b>                |       | 54,58 |    | 54,58 |  |  |
| <b>Venous thrombosis</b>      | 22    |       |    | 22    |  |  |
| <b>Peripheral circulation</b> | 35    | 35    |    | 35    |  |  |
| <b>Access to blood vessel</b> |       |       | 43 | 43    |  |  |

FAST= (Focused assessment with sonography in trauma). US scan for detection of intraperitoneal fluid



# Supplemental Appendix 5. Quality assessment

## *Point-of-care ultrasound in general practice: A systematic review*

This web appendix provides to tables. The first table (Web table 5.1) lists the used quality measurements in the included articles. The second tables (Web table 5.2) list the described quality in the included articles.

**Web table 5.1 Quality measurement**

| Quality Measure                                             | N* | Reference.                                |
|-------------------------------------------------------------|----|-------------------------------------------|
| Compared to a specialist's scan                             | 11 | 17,19,20,39,50,51,52,59,60,64,67          |
| Compared to birth outcome**                                 | 6  | 36,40,49,55,56,61                         |
| Journal audit                                               | 10 | 32,33,36,37,40,49,57,58,61,66             |
| Interobserver agreement                                     | 3  | 30,38,39                                  |
| Uploaded scan for review/ review of video or still pictures | 14 | 22,23,25,26,27,38,39,42,45,46,47,48,51,66 |
| Supervised scan                                             | 7  | 17,22,48,60,63,64,65                      |
| Repeated scan of positive findings by specialist            | 4  | 33,37,41,59                               |
| Compared to CT                                              | 4  | 38,41,54,59                               |
| Examination after training programme                        | 12 | 17,20,22,33,45,46,51,55,58,59,63,65       |
| Not declared                                                | 13 | 18,20,24,28,29,31,34,35,42,43,44,53,62    |

N\* = number of studies

**Web table 5.2: Quality assessment**

| Organ | Comparison                              | Sensitivity | Specificity | Interrater variability | Percent of ultrasound exams deemed acceptable | Confirmed diagnosis | Hours of training | Year of publication | Downs and Black score | Ref. |
|-------|-----------------------------------------|-------------|-------------|------------------------|-----------------------------------------------|---------------------|-------------------|---------------------|-----------------------|------|
| Aorta | Specialist scan                         | 100%        | 100%        | -                      |                                               | 100%                | 2.3               | 2001                | 10                    | 17   |
| Aorta | Specialist scan                         | 100%        | 100%        | -                      | -                                             | -                   | ND                | 2012                | 13                    | 19   |
| Aorta | Positive findings re-scanned            | -           | -           | -                      | -                                             | 11/14 (79%)         | 25                | 2017                | 15                    | 59   |
| Heart | Specialist scan                         | 73%         | 75%         | -                      | -                                             | -                   | 4                 | 2015                | 18                    | 21   |
| Heart | Review                                  | -           | -           | -                      | 40%                                           | 29/44 (66%)         | 320               | 1985                | 11                    | 27   |
| Heart | Review                                  |             |             | Kappa 0.52             | 80.8%                                         | 84.2%               | 28                | 2016                | 17                    | 39   |
| Heart | Specialist scan                         | 77.4%       | 85.4%       | -                      | -                                             | -                   | 8                 | 2012                | 17                    | 52   |
| Heart | Specialist scan                         | -           | -           | -                      | -                                             | 192/200 (96%)       | ND                | 2002                | 10                    | 67   |
| Lung  | Interobserver agreement between two GPs | -           | -           | Kappa 0.79             | -                                             | -                   | 14                | 2015                | 18                    | 30   |
| Lung  | Radiographically confirmed              | 92.2%       | 95.2%       | Kappa 0.65             | -                                             | -                   | 7 day             | 2017                | 20                    | 38   |

|                                            |                              |       |       |                              |     |                                                                  |     |      |    |    |
|--------------------------------------------|------------------------------|-------|-------|------------------------------|-----|------------------------------------------------------------------|-----|------|----|----|
|                                            | clinical pneumonia           |       |       |                              |     |                                                                  |     |      |    |    |
| <b>Abdomen</b>                             | Positive findings re-scanned | -     | -     | -                            | -   | 26/27 (96%)                                                      | ND  | 1990 | 10 | 37 |
| <b>aorta, gallbladder, kidney, abdomen</b> | Known pathology              | -     | -     | -                            | -   | 65 %                                                             | 4   | 2016 | 17 | 63 |
| <b>Kidney</b>                              | Positive findings rescanned  | 82%   | 99%   | -                            | -   | -                                                                | ND  | 2003 | 8  | 41 |
| <b>Urinary tract</b>                       | review                       | -     | -     | -                            | 90% | -                                                                | ND  | 2004 | 11 | 48 |
| <b>A.carotis</b>                           | CT                           | -     | -     | -                            | -   | 79%                                                              | ND  | 2016 | 10 | 54 |
| <b>Obstetric</b>                           | Birth outcome                | 97.3% | 97.7% | -                            | -   | -                                                                | ND  | 1996 | 10 | 40 |
| <b>Obstetric</b>                           | Review                       | -     | -     | -                            | 97% | -                                                                | 52+ | 1988 | 8  | 45 |
| <b>Obstetric</b>                           | Review                       | -     | -     | -                            | 94% | -                                                                | 52+ | 1988 | 12 | 46 |
| <b>Obstetric</b>                           | Birth outcome                | -     | -     | GA as accurate as specialist | -   | 100% (twins)                                                     | 278 | 2002 | 12 | 49 |
| <b>Obstetric</b>                           | Specialist scan              | -     | -     | -                            | -   | Mean difference in GA 1,5 days                                   | ND  | 2001 | 13 | 50 |
| <b>Obstetric</b>                           | Birth outcome                | -     | -     | -                            | -   | GA mean difference 1.1 day, multiple gestation PPV and NPV 100%, | 52+ | 1990 | 15 | 55 |

|                                                                                              |                                                    |     |     |                                                                                       |    |                                                                                                                      |    |      |    |    |
|----------------------------------------------------------------------------------------------|----------------------------------------------------|-----|-----|---------------------------------------------------------------------------------------|----|----------------------------------------------------------------------------------------------------------------------|----|------|----|----|
|                                                                                              |                                                    |     |     |                                                                                       |    | fetal death PPV<br>85% NPV 98%,<br>11% false<br>positive<br>placenta<br>praevia,<br>1 major<br>abnormality<br>missed |    |      |    |    |
| <b>Obstetric</b>                                                                             | Birth<br>outcome                                   | -   | -   | -                                                                                     | -  | GA 92% and 96<br>%<br>No diagnoses<br>missed                                                                         | 24 | 1990 | 16 | 56 |
| <b>Obstetric</b>                                                                             | Specialist<br>scan                                 | -   | -   | resident-<br>faculty %<br>difference:<br>3.6% for AC,<br>1.6% for HC,<br>1.9% for BPD | -  | -                                                                                                                    | ND | 1991 | 15 | 60 |
| <b>Broad use: *</b><br><b>(Abdomen,<br/>lung, heart,<br/>bladder,<br/>spleen,<br/>aorta)</b> | Specialist<br>scan                                 | 91% | 83% | -                                                                                     | -  | -                                                                                                                    | 43 | 2015 | 11 | 32 |
| <b>Broad use:</b>                                                                            | Review                                             | -   | -   | -                                                                                     | 85 | 9/9<br>(100%)                                                                                                        | ND | 1999 | 7  | 47 |
| <b>Broad use:</b>                                                                            | Journal<br>audit/re-<br>examination<br>of positive | -   | -   | Internal<br>reliability<br>96%, external                                              | -  | 23/28<br>(82%)                                                                                                       | ND | 1993 | 9  | 57 |

|                   |                        |                   |     |                    |   |                |    |      |    |    |
|-------------------|------------------------|-------------------|-----|--------------------|---|----------------|----|------|----|----|
|                   | findings by specialist |                   |     | reliability<br>82% |   |                |    |      |    |    |
| <b>Broad use:</b> | Journal audit          | -                 | -   | -                  | - | 64/72<br>(89%) | ND | 2000 | 9  | 58 |
| <b>Broad use:</b> | Specialist scan        | 98%<br>100%<br>GA | 95% | Kappa 0.93         | - | -              | ND | 2017 | 13 | 51 |

GA= gestational age, PPV= positive predictive value, NPV = negative predictive value, AC = abdominal circumference, HC = head circumference, BPD = biparietal diameter

\* only 37% of US scan was performed by GP
